# Supplementary material
Source: publisher figshare collection journal article supplement (https://frontiersin.figshare.com/ndownloader/files/14892317)
Supplement: Supplementary file [file 14892317]

*Supplementary Material*

## Supplementary Figures

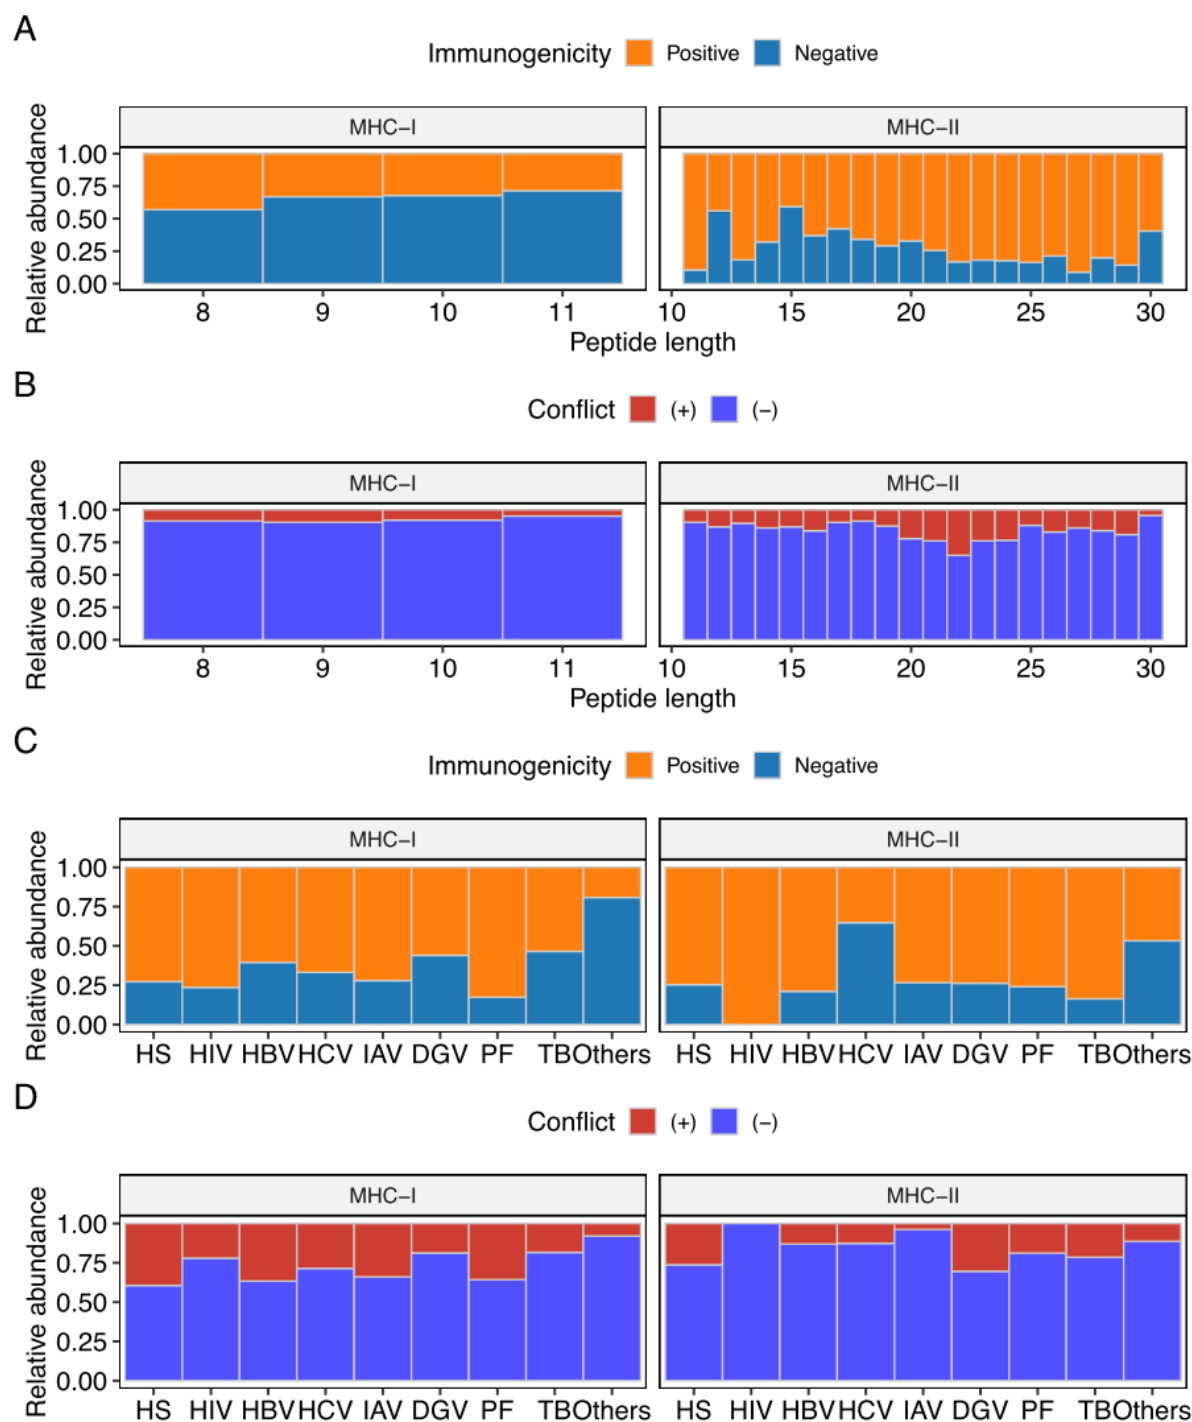

**Supplementary Figure 1. Characteristics of the epitope dataset.** (A and B) Relative abundance of (A) immunogenicity annotations and (B) conflicts in immunogenicity annotations among peptides of different lengths. (C and D) Relative abundance of (C) immunogenicity annotations and (D) conflicts in immunogenicity annotations among peptides of different origins. HS, homo sapiens; HIV, human

immunodeficiency virus type 1; HBV, hepatitis B virus; HCV, hepatitis C virus; IAV, influenza A virus; DGV, dengue virus; PF, *Plasmodium falciparum*; TB, *Mycobacterium tuberculosis*; Others, peptides derived from other organisms (peptides with no source organism annotation were excluded).

A

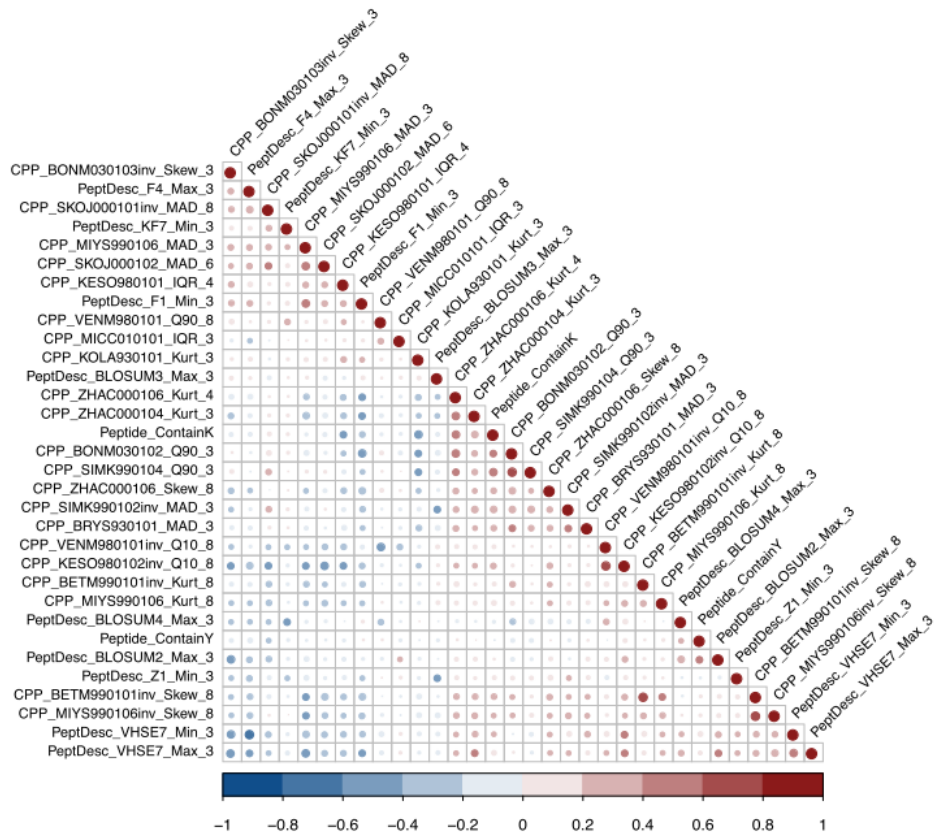

B

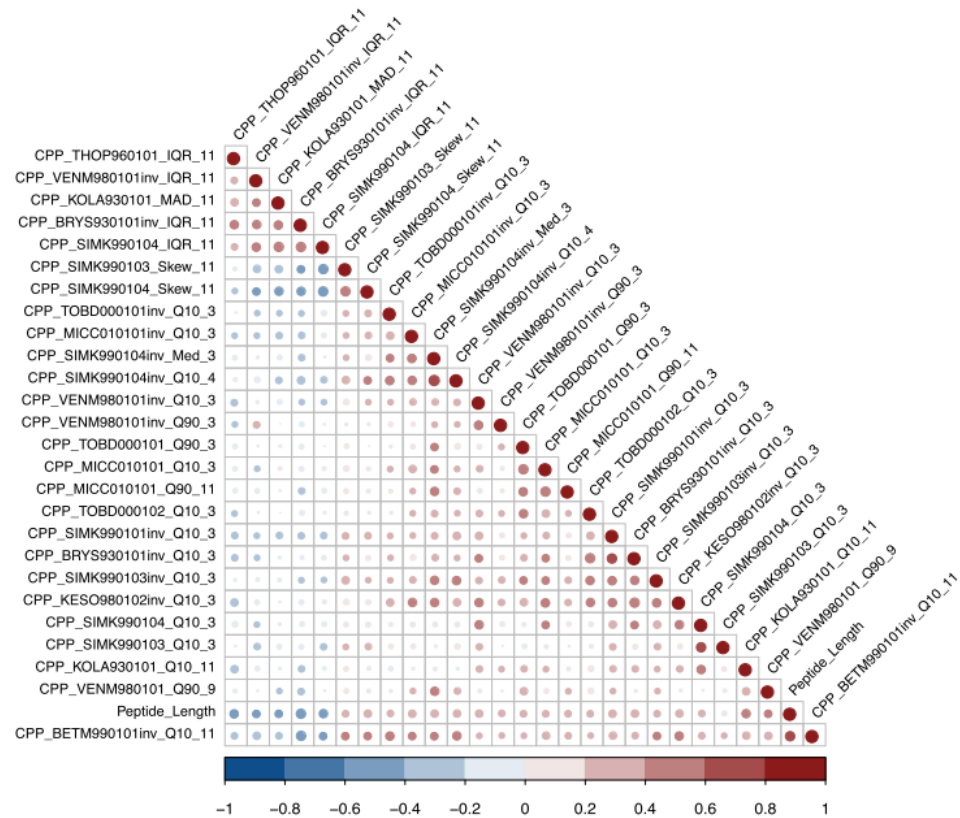

**Supplementary Figure 2. Correlograms of the minimal sets of features selected as the most predictive of epitope immunogenicity.** Eighty percent of the entire epitope dataset was randomly extracted, and feature importance was estimated by training a random forest classifier. Based on the feature importance estimates, top 100 features were selected. This selection process was repeated ten times, and the consensus feature sets were generated for both MHC-I and MHC-II epitopes. Correlations between each of the features are depicted as correlograms. Features computed through the TCR-peptide contact potential profiling (CPP) have the suffix of “CPP\_.” computed from peptide descriptors analysis have the suffix of “PeptDesc\_.” (A) Features for MHC-I-restricted peptides (N=32). (B) Features for MHC-II-restricted peptides (N=27). Features were reordered by the hierarchical clustering algorithm.

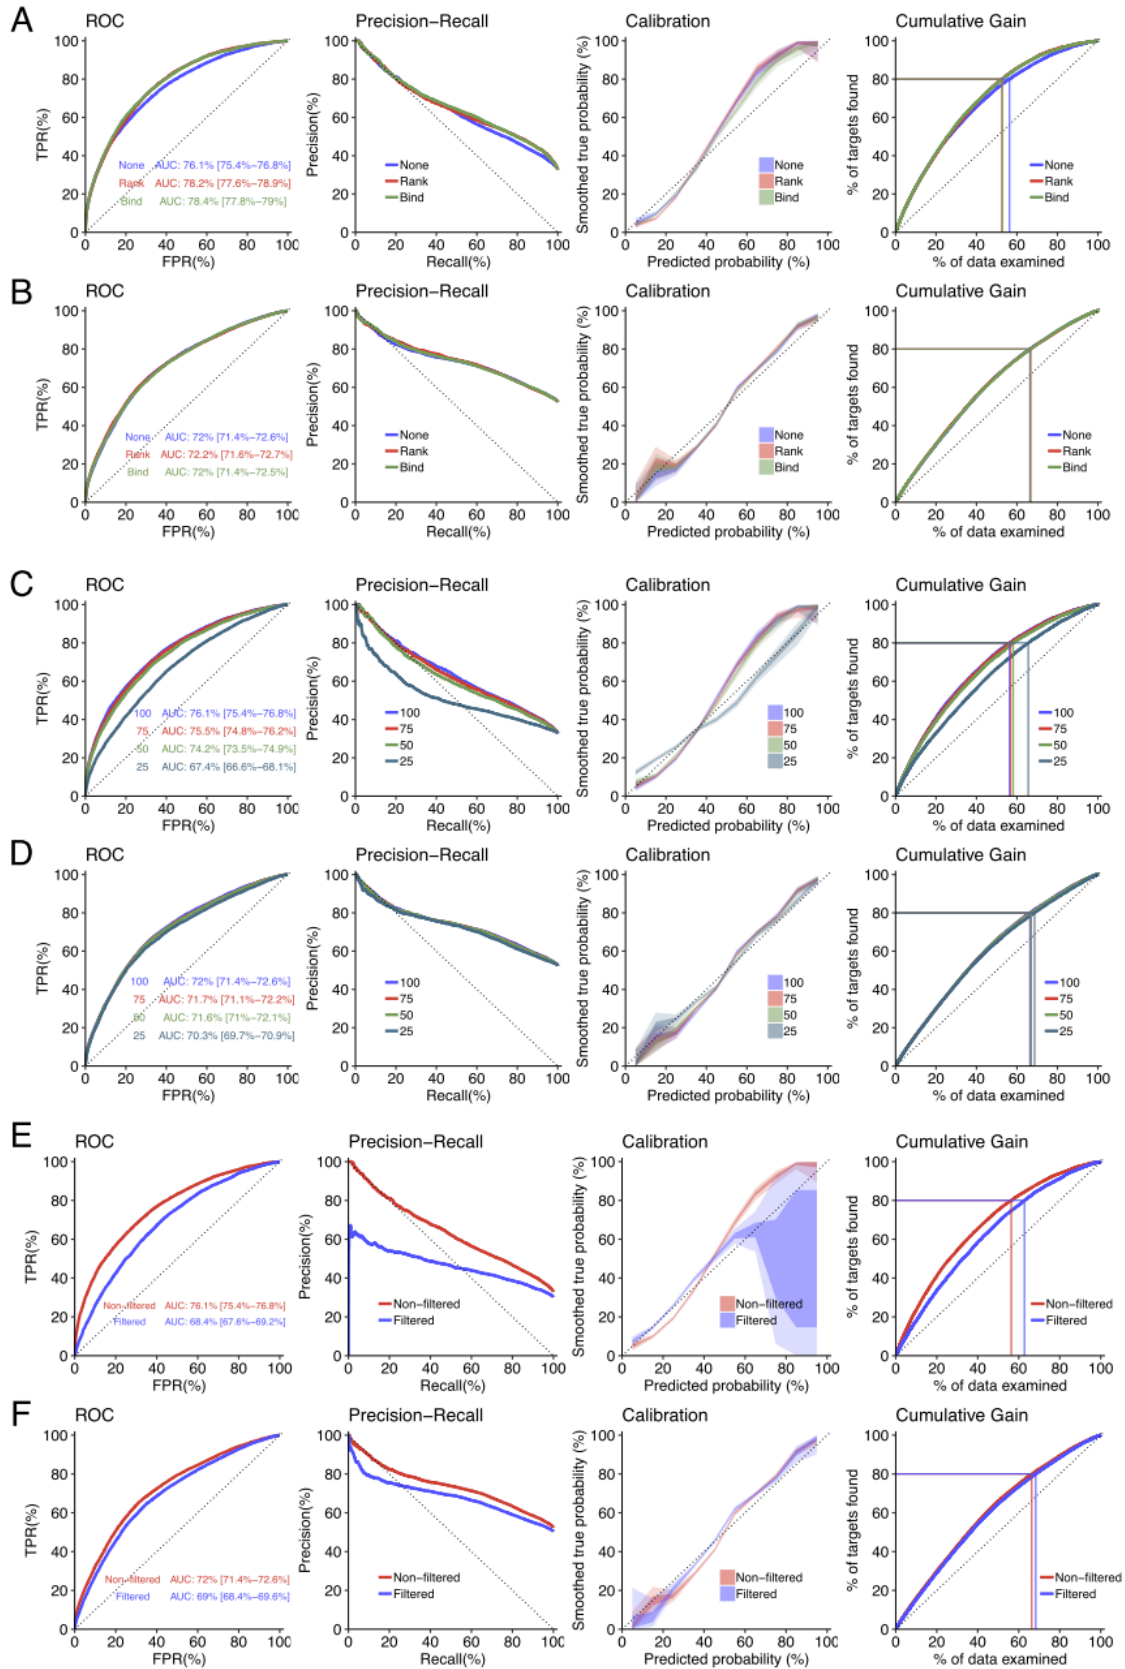

**Supplementary Figure 3. Robustness analysis of immunogenicity predictions.** Performances of probabilistic estimates computed through machine learning under various conditions were examined. (A and B) Addition of MHC binding prediction results as features for machine learning. Rank, percentile ranks; Bind, binding strength categories. (A) MHC-I-restricted peptides. (B) MHC-II-restricted peptides. (C and D) Machine learning with smaller cutoff values for feature selection. (C) MHC-I-restricted peptides. The actual numbers of features retained after feature selection were 32, 26, 19, and 7, respectively. (D) MHC-II-restricted peptides. The actual numbers of features retained were 27, 23, 21, and 12, respectively. (E and F) Peptide homology-based clustering before machine learning. The IEDB Epitope Cluster Analysis Tool (<http://tools.iedb.org/cluster/>) was used to cluster the peptides with the homology threshold of 80%. One peptide per cluster was randomly chosen (“Filtered”). This step is intended to reduce the effect of potential overfitting due to sequence-level homology. (E) MHC-I-restricted peptides. A total of 16,765 peptides were retained after clustering. (F) MHC-II-restricted peptides. A total of 23,983 peptides were retained after clustering.

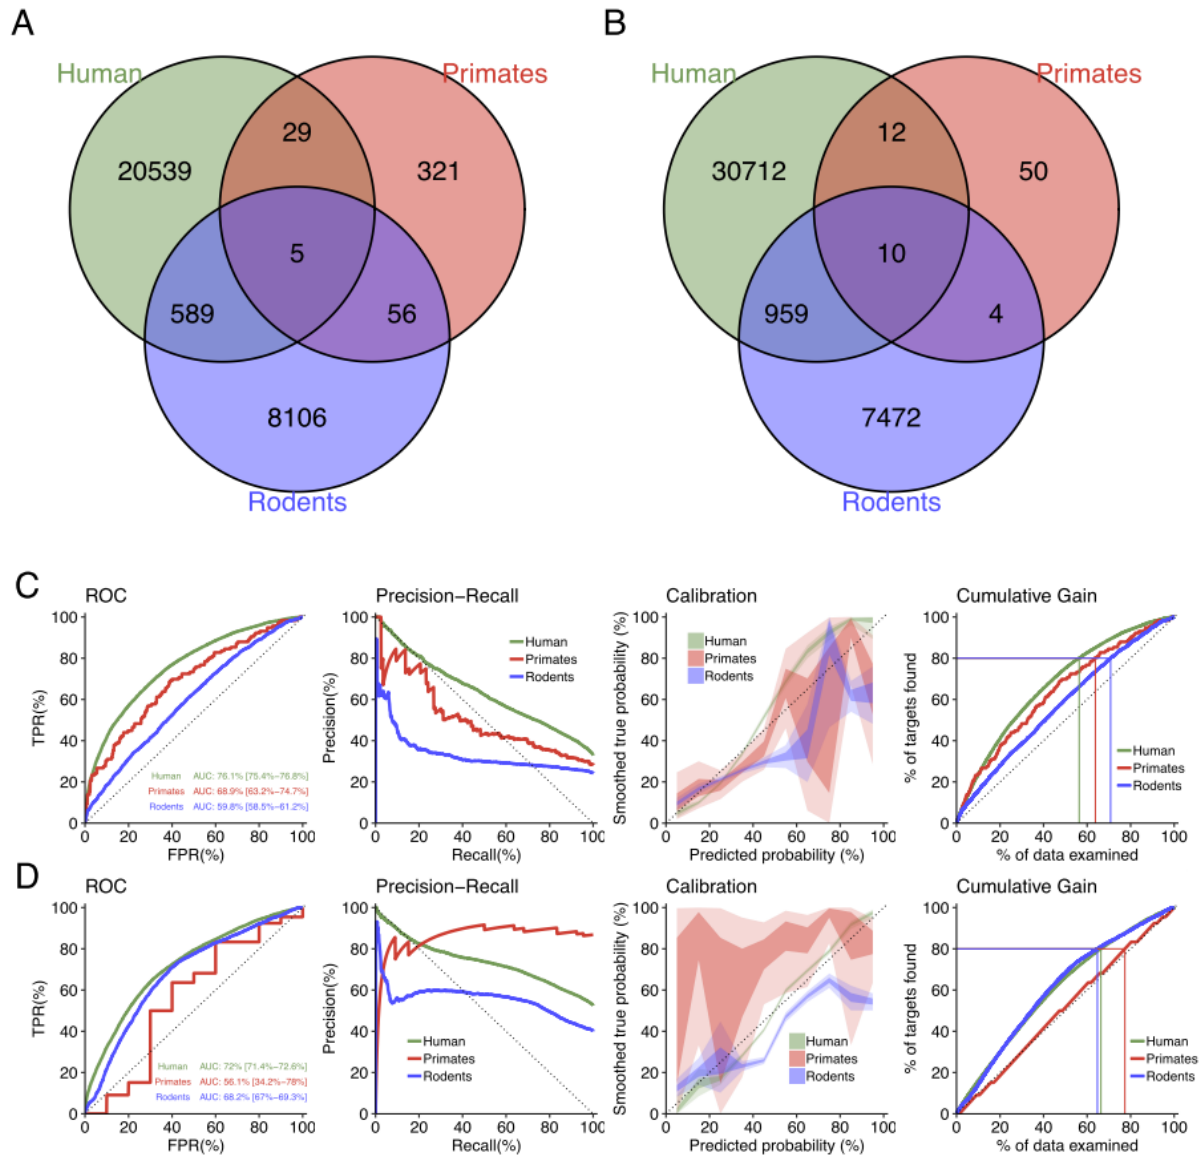

**Supplementary Figure 4. Extrapolation of the human immunogenicity prediction framework for primate and rodent epitopes.** (A and B) Overlaps between (A) MHC-I-restricted and (B) MHC-II-restricted peptides presented on MHC molecules of different species. (C and D) Predictive performances of the probabilities of immunogenicity for (C) MHC-I-restricted and (D) MHC-II-restricted peptides. Probabilities for non-human peptides were estimated by applying the classifiers trained on the human peptide datasets.



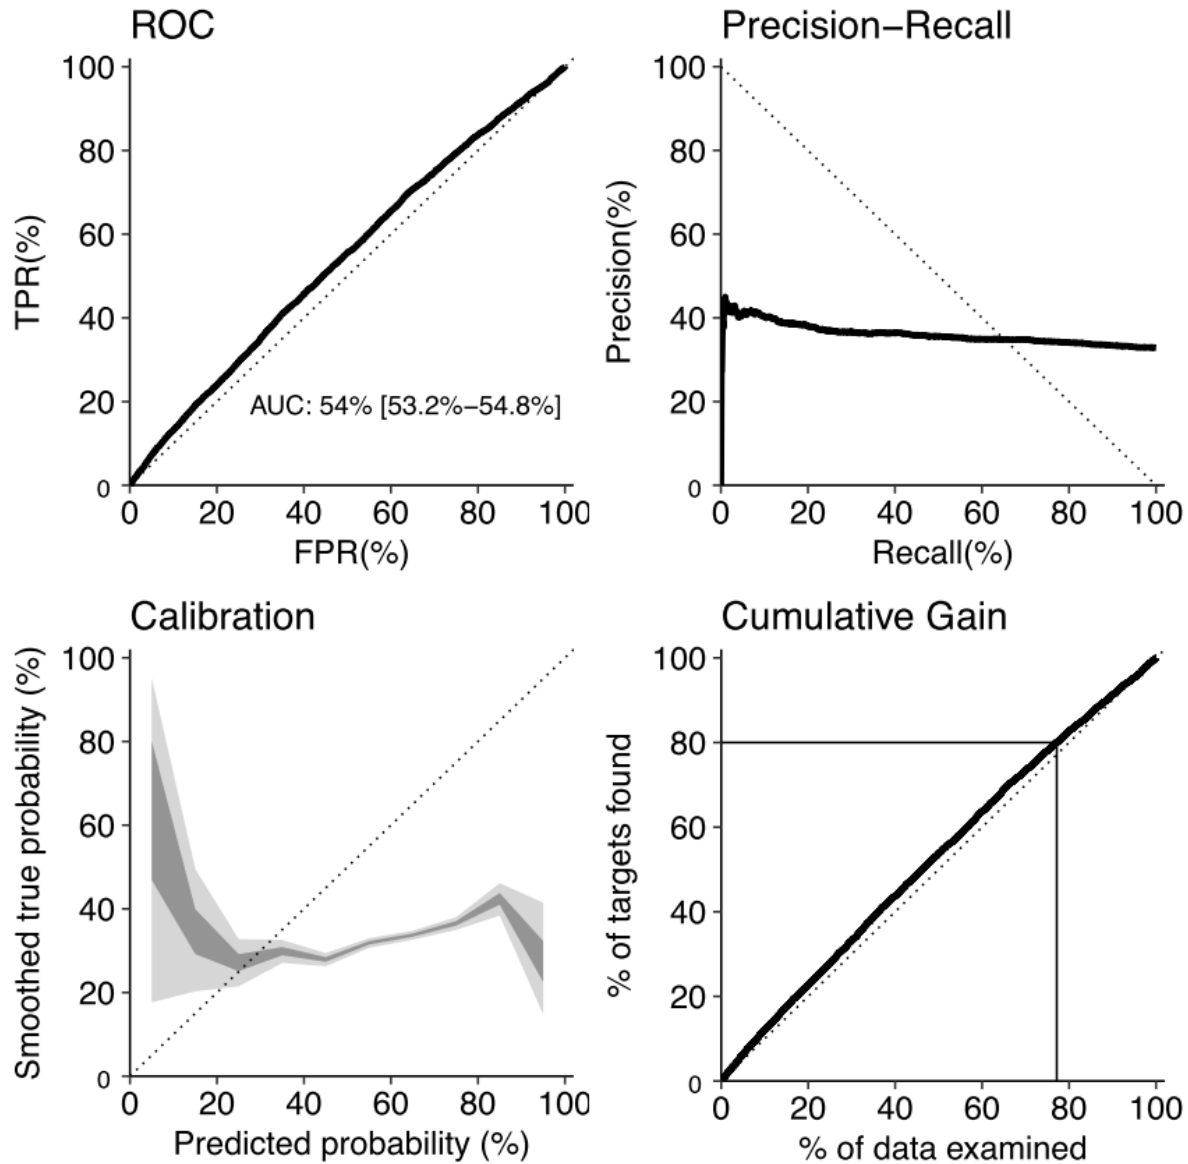

**Supplementary Figure 5. Immunogenicity prediction of HLA-I-restricted peptides by the IEDB Class I Immunogenicity Tool.** Classification performances were evaluated using the prediction scores (rescaled to 0-1 range) derived from the IEDB Class I Immunogenicity Tool (34) (<http://tools.iedb.org/immunogenicity/>) with default settings. Note that peptides used for training the model in the original paper were not excluded from prediction, which theoretically overestimates its predictive performance.

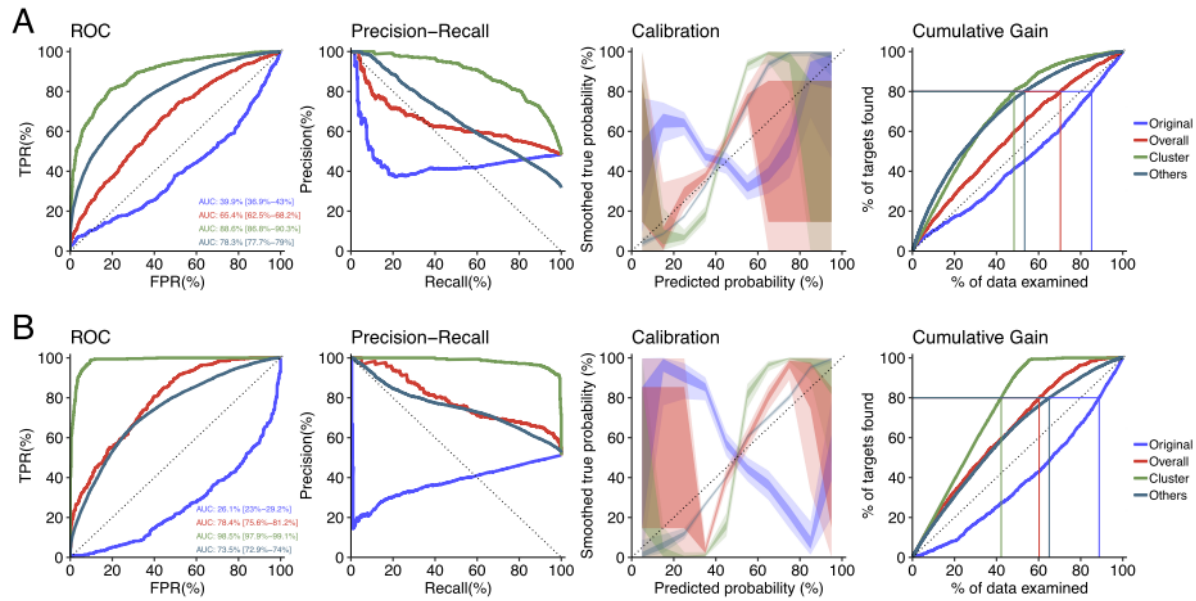

**Supplementary Figure 6. Improvement of predictive performances of immunogenicity scores for transitional peptides by integrating the neighbor network architectures in sequence space.**

Predictive performances of the immunogenicity scores of (A) MHC-I- and (B) MHC-II-restricted transitional peptides, *i.e.*, peptides with at least one neighbor of opposite immunogenicity annotation in our dataset, were evaluated. We identified 1,360 and 976 transitional peptides for MHC-I and MHC-II, respectively. We expanded their neighbor networks by computing immunogenicity scores for 232,723 and 292,437 all possible single-aa mutants of transitional MHC-I- and MHC-II-restricted peptides, respectively. Original, original immunogenicity scores; Overall, mean immunogenicity scores of all neighbors. Cluster, mean immunogenicity scores of neighbors assigned to the cluster containing the parent peptide. Others, original immunogenicity scores for peptides with no evidence of immune transition (shown for comparison purpose).

# Supplementary Tables

**Supplementary Table 1. Variance inflation factors (VIFs) of the features used in the multivariate regression analysis against experimentally determined TCR affinities.**

| Feature                   | VIF  |
|---------------------------|------|
| sCPP_BETM990101inv_Skew_4 | 1.25 |
| sCPP_KESO980102inv_Kurt_3 | 1.11 |
| sCPP_KOLA930101_Skew_4    | 1.29 |
| sCPP_SIMK990104_SD_3      | 1.14 |
| sCPP_VENM980101inv_Min_3  | 1.06 |

## **Supplementary Datasets**

### **Supplementary Data 1. (separate file)**

Affinities and structures of known TCR-peptide pairs collected from the literature

### **Supplementary Data 2. (separate file)**

Human, primate, and rodent T cell epitope data sets.

### **Supplementary Data 3. (separate file)**

Feature importance estimates for MHC-I and MHC-II epitope immunogenicity prediction.

### **Supplementary Data 4. (separate file)**

Immunogenicity scores for MHC-I and MHC-II epitope.

### **Supplementary Data 5. (separate file)**

Single amino acid mutant pairs identified in the human MHC-I and MHC-II epitope datasets.

### **Supplementary Data 6. (separate file)**

A list of AAIndex amino acid pairwise contact potential scales utilized in this study.
